# Supplementary material for: Anaesthetic-dependent changes in gene expression following acute and chronic exposure in the rodent brain
Source: PubMed Central journal article supplement (PMC7283325; doi:10.1038/s41598-020-66122-6), 2020-06-09
Supplement: 41598_2020_66122_MOESM1_ESM.pdf [file 41598_2020_66122_MOESM1_ESM.pdf]

## Anaesthetic-dependent changes in gene expression following acute and chronic exposure in the rodent brain

Dannielle H. Upton, Kata Popovic, Roger Fulton, and Michael Kassiou

| Gene Symbol       | Acute Avg (log2) | Chronic Avg (log2) | Fold Change | ANOVA p-value |
|-------------------|------------------|--------------------|-------------|---------------|
| <b>Control</b>    |                  |                    |             |               |
| Tph1              | 4.67             | 12.68              | -258.71     | 0.0259        |
| Pde6g             | 4.68             | 7.29               | -6.12       | 0.0142        |
| Neurod4           | 4.2              | 6.46               | -4.8        | 0.0191        |
| Gnat2             | 4.43             | 6.1                | -3.19       | 0.0368        |
| Pde6c             | 4.98             | 6.53               | -2.94       | 0.0042        |
| Gngt1             | 5.07             | 6.33               | -2.4        | 0.0008        |
| Hoxa5             | 3.32             | 4.55               | -2.34       | 0.003         |
| Hoxa6             | 3.55             | 4.65               | -2.14       | 0.002         |
| Tnfaip2           | 5.22             | 6.29               | -2.09       | 0.0049        |
| Ighg; Igh-6       | 5.72             | 6.78               | -2.08       | 0.0091        |
| Guca1a            | 3.48             | 4.52               | -2.05       | 0.0191        |
| Vom1r50           | 4.99             | 5.99               | -2          | 0.0325        |
| Vom2r1            | 4.12             | 3.11               | 2.01        | 0.001         |
| Cyp4v3            | 9.05             | 8.04               | 2.02        | 0.0036        |
| Olr1700           | 4.1              | 3.02               | 2.11        | 0.0123        |
| Tshb              | 6.6              | 5.5                | 2.15        | 0.0423        |
| Slamf1            | 5                | 3.85               | 2.22        | 0.0015        |
| Fcrl2             | 6.7              | 4.69               | 4.01        | 0.009         |
| <b>Isoflurane</b> |                  |                    |             |               |
| Plekhh3           | 5.32             | 6.51               | -2.28       | 0.0038        |
| Nuak2             | 3.41             | 4.58               | -2.25       | 0.0009        |
| Ttc30a            | 3.81             | 4.98               | -2.25       | 3.78E-05      |
| XAF1              | 4.76             | 5.83               | -2.09       | 0.006         |
| C3                | 6.13             | 7.14               | -2.02       | 0.0189        |
| LOC102555445      | 5.61             | 4.61               | 2           | 0.0467        |
| Ccl17             | 3.56             | 2.55               | 2.01        | 0.032         |
| Itpr1l1           | 6.91             | 5.88               | 2.04        | 0.0164        |
| Lmod2             | 3.87             | 2.84               | 2.05        | 0.0223        |
| Pi15              | 5.39             | 4.35               | 2.06        | 0.012         |
| Gdf9              | 4.83             | 3.75               | 2.11        | 0.0374        |
| Csmd2             | 7.58             | 6.51               | 2.11        | 0.0034        |
| Grifin            | 5.56             | 4.45               | 2.17        | 0.0113        |
| Frmd7             | 4.16             | 3                  | 2.24        | 0.0455        |
| Wdr49             | 5.51             | 4.3                | 2.32        | 0.0027        |
| RT1-M6-2          | 5.31             | 3.79               | 2.86        | 0.0199        |
| Asb15             | 11.52            | 3.58               | 246.3       | 4.22E-05      |
| <b>Ketamine</b>   |                  |                    |             |               |
| Sycp2l            | 4.43             | 5.69               | -2.4        | 0.0405        |
| Avp               | 13               | 14.14              | -2.2        | 0.0093        |
| Mcm5              | 3.62             | 4.72               | -2.14       | 0.0048        |
| Bpifb3            | 3.74             | 4.81               | -2.1        | 0.0069        |

|                 |      |      |       |          |
|-----------------|------|------|-------|----------|
| Inca1           | 3.7  | 4.73 | -2.04 | 0.0013   |
| Vom2r1          | 4.32 | 3.27 | 2.07  | 0.0066   |
| Olr586          | 4.41 | 3.3  | 2.15  | 0.0064   |
| Ifna16l1        | 5.15 | 3.92 | 2.34  | 1.66E-06 |
| Ly49s7; Klra5   | 4.25 | 3.01 | 2.35  | 0.0247   |
| <b>Propofol</b> |      |      |       |          |
| Hoxa6           | 3.46 | 4.56 | -2.14 | 0.0342   |
| Zfp72           | 5.41 | 6.5  | -2.12 | 0.0473   |
| LOC102553524    | 5.75 | 6.82 | -2.09 | 0.0012   |
| Bmp4            | 9.87 | 8.84 | 2.04  | 0.0215   |
| Klkb1           | 4.64 | 3.34 | 2.47  | 0.0107   |

**Supplementary Table 1** Acute treatments vs Chronic treatments - Detailed average expression levels, fold change and p-values for significant probe sets. Non functionally characterised genes have been removed from analysis

| Gene Symbol                   | Acute Control<br>Avg (log2) | Acute Treatment<br>Avg (log2) | Fold Change | ANOVA p-value |
|-------------------------------|-----------------------------|-------------------------------|-------------|---------------|
| <b>Isoflurane</b>             |                             |                               |             |               |
| Asb15                         | 3.8                         | 11.65                         | -230.12     | 0.0001        |
| Tshb                          | 6.02                        | 7.38                          | -2.57       | 0.0002        |
| Rdh5                          | 5.98                        | 7.17                          | -2.28       | 0.019         |
| She                           | 5.23                        | 6.35                          | -2.17       | 0.0012        |
| LOC100360997                  | 4.9                         | 6.01                          | -2.15       | 0.0047        |
| Sox18                         | 5.24                        | 6.32                          | -2.11       | 0.0004        |
| LOC100911790                  | 3.89                        | 4.92                          | -2.04       | 0.0256        |
| Aox1                          | 4.8                         | 5.83                          | -2.03       | 0.0291        |
| Spin2a                        | 3.68                        | 4.7                           | -2.02       | 0.0021        |
| Cyr61                         | 5.18                        | 6.19                          | -2.01       | 0.0286        |
| Wdr49                         | 4.62                        | 5.63                          | -2.01       | 0.0023        |
| Ccnd3                         | 5.23                        | 4.22                          | 2           | 1.75E-05      |
| Nr4a3                         | 9.87                        | 8.81                          | 2.09        | 0.0124        |
| Dusp1                         | 14.79                       | 13.73                         | 2.1         | 0.0183        |
| Pdk4                          | 7.21                        | 6.14                          | 2.1         | 0.0085        |
| Olr1055                       | 4.24                        | 3.17                          | 2.1         | 0.0121        |
| Nr4a1                         | 13.53                       | 12.45                         | 2.12        | 0.0257        |
| RGD1560527                    | 4.93                        | 3.84                          | 2.14        | 0.0028        |
| Hspb1                         | 5.97                        | 4.87                          | 2.14        | 0.0183        |
| RGD1560821                    | 5.4                         | 4.24                          | 2.23        | 0.0013        |
| Nfkbia                        | 9.99                        | 8.82                          | 2.26        | 0.0026        |
| Egr2                          | 8.62                        | 7.38                          | 2.35        | 0.0095        |
| Npas4                         | 9.44                        | 8.09                          | 2.55        | 2.84E-05      |
| NONMMUG006795                 | 4.72                        | 3.31                          | 2.65        | 0.0208        |
| Rpl39l                        | 4.18                        | 2.54                          | 3.12        | 0.0164        |
| Arc                           | 10.36                       | 8.61                          | 3.36        | 0.0005        |
| Fcrl2                         | 5.94                        | 3.66                          | 4.86        | 2.83E-05      |
| <b>Ketamine</b>               |                             |                               |             |               |
| Tph1                          | 4.99                        | 11.96                         | -125.39     | 0.0336        |
| Cyr61                         | 5.53                        | 6.94                          | -2.67       | 0.0038        |
| Vom2r25                       | 2.94                        | 4.3                           | -2.57       | 0.0004        |
| LOC680910                     | 5.88                        | 7.2                           | -2.5        | 0.0076        |
| LOC685699                     | 4.45                        | 5.75                          | -2.47       | 0.0018        |
| Ly49s7; Klr5;<br>LOC100911234 | 3.46                        | 4.66                          | -2.29       | 0.0068        |
| Apold1                        | 6.44                        | 7.63                          | -2.27       | 7.90E-05      |
| Olr59                         | 8.04                        | 9.21                          | -2.24       | 0.0309        |
| Igkc; LOC500183               | 5.81                        | 6.97                          | -2.24       | 0.0259        |
| Klkb1                         | 3.56                        | 4.72                          | -2.24       | 0.0016        |
| Dkk2                          | 4.16                        | 5.32                          | -2.23       | 0.0009        |
| Ly49i7;<br>LOC100911272       | 3.5                         | 4.65                          | -2.22       | 0.0354        |
| Casz1                         | 4.89                        | 5.99                          | -2.15       | 0.0006        |
| Ahsp                          | 3.93                        | 5.01                          | -2.12       | 0.0003        |
| Fign                          | 4.87                        | 5.93                          | -2.09       | 0.0078        |
| Ifit3                         | 4.64                        | 5.69                          | -2.07       | 0.0009        |
| Foxf1                         | 6.21                        | 7.23                          | -2.03       | 0.0026        |

|                  |       |       |         |          |
|------------------|-------|-------|---------|----------|
| NONMMUG036691    | 3.24  | 4.25  | -2.01   | 0.0301   |
| LOC307727        | 3.53  | 2.52  | 2.02    | 0.0036   |
| Wfikkn1          | 6.31  | 5.28  | 2.04    | 0.0066   |
| LOC100912354     | 5.47  | 4.42  | 2.06    | 0.0076   |
| Mboat4           | 5.17  | 4.11  | 2.08    | 0.0001   |
| Nr4a1            | 13.57 | 12.51 | 2.09    | 0.0003   |
| LOC502908        | 5.62  | 4.53  | 2.13    | 0.0349   |
| Gdf9             | 5.06  | 3.96  | 2.14    | 0.0422   |
| Tm6sf2           | 5.84  | 4.65  | 2.29    | 0.0011   |
| Pdzd3            | 4.65  | 3.45  | 2.29    | 0.0004   |
| Ang; Rnase4      | 12.09 | 10.85 | 2.37    | 0.0265   |
| Egr2             | 8.93  | 7.63  | 2.46    | 0.0026   |
| Fos              | 10.04 | 8.69  | 2.55    | 0.001    |
| Npas4            | 9.65  | 8.23  | 2.69    | 3.50E-06 |
| Slc39a12         | 8.39  | 6.87  | 2.88    | 0.0205   |
| Arc              | 10.72 | 8.59  | 4.38    | 6.90E-07 |
| Fcrl2            | 6.57  | 4.32  | 4.75    | 6.70E-05 |
| <b>Propofol</b>  |       |       |         |          |
| Asb15            | 3.96  | 11.98 | -259.24 | 0.0102   |
| Cyr61            | 5.56  | 6.82  | -2.4    | 0.0003   |
| Nt5c3a           | 12.24 | 13.45 | -2.33   | 0.0005   |
| Klkb1            | 3.23  | 4.41  | -2.27   | 0.0008   |
| Rbp3             | 3.26  | 4.4   | -2.19   | 0.0183   |
| Ighg; Igh-6      | 5.89  | 6.99  | -2.15   | 0.0182   |
| LOC685699        | 4.24  | 5.34  | -2.15   | 0.0158   |
| Scgn             | 5.05  | 6.11  | -2.08   | 0.0002   |
| Tor4a            | 5.84  | 6.87  | -2.03   | 0.022    |
| Vwa3b            | 4.05  | 5.06  | -2.01   | 0.0019   |
| Nr4a3            | 10.07 | 9.07  | 2       | 0.0019   |
| Pax5             | 4.01  | 3     | 2.02    | 0.0034   |
| Nr4a1            | 13.75 | 12.72 | 2.05    | 0.0005   |
| LOC499219        | 4.71  | 3.65  | 2.09    | 0.0412   |
| Olr1539; Olr1537 | 4.81  | 3.72  | 2.14    | 0.0048   |
| Hspb1            | 6.64  | 5.49  | 2.22    | 0.0038   |
| Il13ra2          | 5.22  | 4.04  | 2.26    | 0.0071   |
| LOC100361731     | 3.81  | 2.6   | 2.31    | 0.0242   |
| Tm6sf2           | 5.94  | 4.67  | 2.41    | 4.36E-05 |
| Egr2             | 8.9   | 7.52  | 2.6     | 0.002    |
| Npas4            | 9.77  | 7.91  | 3.62    | 3.89E-07 |
| Arc              | 10.89 | 9.02  | 3.65    | 9.87E-06 |
| Fcrl2            | 6.87  | 4.97  | 3.75    | 0.0377   |
| Zfp72            | 7.27  | 4.66  | 6.13    | 0.0229   |

**Supplementary Table 2** Acute Control vs Acute Treatments - Detailed average expression levels, fold change and p-values for significant probe sets. Non functionally characterised genes have been removed from analysis

| Gene Symbol                                                                     | Chronic Control<br>Avg (log2) | Chronic Isoflurane<br>Avg (log2) | Fold Change | ANOVA p-value |
|---------------------------------------------------------------------------------|-------------------------------|----------------------------------|-------------|---------------|
| <b>Isoflurane</b>                                                               |                               |                                  |             |               |
| Cga                                                                             | 7.22                          | 9.35                             | -4.37       | 0.0015        |
| Tshb                                                                            | 5.04                          | 7.16                             | -4.35       | 0.0022        |
| Bmp4                                                                            | 8.78                          | 10.26                            | -2.78       | 0.0324        |
| Cyr61                                                                           | 5.41                          | 6.84                             | -2.7        | 0.0004        |
| Hes5                                                                            | 6.34                          | 7.64                             | -2.46       | 0.0002        |
| Id1                                                                             | 10.82                         | 11.94                            | -2.17       | 0.0001        |
| Hes1                                                                            | 7.67                          | 8.73                             | -2.08       | 0.0001        |
| Olr1319; Olr1320;<br>Olr1323; Olr1325;<br>Olr1327; Olr1328;<br>Olr1321; Olr1318 | 3.06                          | 4.12                             | -2.07       | 0.0001        |
| Spetex-2E                                                                       | 5.08                          | 6.09                             | -2.02       | 0.0377        |
| Defa5                                                                           | 5.1                           | 4.08                             | 2.02        | 0.001         |
| Nfkbia                                                                          | 10.02                         | 8.99                             | 2.05        | 0.0024        |
| Fos                                                                             | 9.46                          | 8.42                             | 2.06        | 0.0289        |
| RGD1562035                                                                      | 5.03                          | 3.96                             | 2.09        | 0.0067        |
| ENSMUSG00000098857                                                              | 6.28                          | 5.15                             | 2.18        | 0.016         |
| Gngt1                                                                           | 6.9                           | 5.75                             | 2.22        | 0.0176        |
| Npas4                                                                           | 9.49                          | 8.23                             | 2.39        | 8.25E-06      |
| LOC102555445                                                                    | 6.24                          | 4.8                              | 2.71        | 0.0403        |
| LOC100909947                                                                    | 7.08                          | 5.43                             | 3.14        | 0.0414        |
| <b>Ketamine</b>                                                                 |                               |                                  |             |               |
| Tshb                                                                            | 4.96                          | 7.09                             | -4.39       | 0.0009        |
| Cga                                                                             | 7.29                          | 8.99                             | -3.26       | 0.0019        |
| Hoxa2                                                                           | 4.18                          | 5.5                              | -2.5        | 0.0194        |
| Serpine1                                                                        | 3.93                          | 5.18                             | -2.39       | 7.41E-05      |
| Foxf1                                                                           | 6.17                          | 7.4                              | -2.35       | 8.15E-05      |
| Apold1                                                                          | 7                             | 8.1                              | -2.14       | 0.0009        |
| LOC500300                                                                       | 4.31                          | 5.4                              | -2.13       | 0.0007        |
| Aurkb                                                                           | 4.1                           | 5.17                             | -2.09       | 0.0347        |
| LOC691196                                                                       | 3.33                          | 4.36                             | -2.04       | 0.0083        |
| Ifit3                                                                           | 4.93                          | 5.94                             | -2.02       | 0.0004        |
| Atf3                                                                            | 4.41                          | 5.42                             | -2.01       | 2.05E-05      |
| Hoxc4                                                                           | 6.54                          | 5.47                             | 2.11        | 0.0002        |
| Olr802                                                                          | 4.46                          | 3.38                             | 2.12        | 0.022         |
| LOC100912565                                                                    | 4.65                          | 3.52                             | 2.19        | 1.18E-05      |
| Defa5                                                                           | 5.18                          | 3.99                             | 2.29        | 0.0012        |
| LOC308990                                                                       | 5.08                          | 3.84                             | 2.35        | 0.0032        |
| Arc                                                                             | 10.03                         | 8.57                             | 2.74        | 0.0002        |
| Npas4                                                                           | 9.8                           | 8.2                              | 3.03        | 4.24E-07      |
| <b>Propofol</b>                                                                 |                               |                                  |             |               |
| Asb15                                                                           | 4.17                          | 8.42                             | -19.01      | 0.0109        |
| Tshb                                                                            | 5.28                          | 7.04                             | -3.36       | 0.001         |
| Cga                                                                             | 7.36                          | 9.03                             | -3.18       | 0.0038        |
| Serpine1                                                                        | 4.17                          | 5.48                             | -2.48       | 3.45E-05      |

|                                          |       |      |       |          |
|------------------------------------------|-------|------|-------|----------|
| LOC500300                                | 3.92  | 5.08 | -2.23 | 0.0401   |
| Cyr61                                    | 5.46  | 6.58 | -2.18 | 0.0001   |
| Pate-f; LOC100911894                     | 3.82  | 4.94 | -2.17 | 0.0191   |
| Lrrc39                                   | 4.23  | 5.33 | -2.14 | 0.0013   |
| Lrrc32                                   | 6.4   | 7.41 | -2.02 | 0.0012   |
| Junb                                     | 10.53 | 9.51 | 2.03  | 0.0022   |
| LOC102553881;<br>LOC102553382            | 8.67  | 7.62 | 2.06  | 0.001    |
| LOC685289;<br>LOC102553520;<br>LOC685275 | 6.43  | 5.38 | 2.08  | 0.0079   |
| Dusp12                                   | 10.52 | 9.42 | 2.14  | 0.0122   |
| Arc                                      | 10.05 | 8.84 | 2.32  | 0.0024   |
| Npas4                                    | 9.88  | 7.64 | 4.7   | 2.62E-07 |

**Supplementary Table 3** Chronic Control vs Chronic Treatments - Detailed average expression levels, fold change and p-values for significant probe sets. Non functionally characterised genes have been removed from analysis
